# Supplementary material
Source: PubMed Central journal article supplement (PMC4029167)
Supplement: NIHMS579235-supplement-Supp_TableS1___FigureS1-S2.pdf [file NIHMS579235-supplement-Supp_TableS1___FigureS1-S2.pdf]

## SUPPORTING INFORMATION

### Elevated levels of the second messenger c-di-GMP contribute to antimicrobial resistance of *Pseudomonas aeruginosa*

Kajal Gupta, Julie Liao, Olga E. Petrova, K. E. Cherny, and Karin Sauer#

Pages 1 -2      Supplementary Table S1  
Page 3          Supplementary Figure S1-S2

#### SUPPLEMENTARY TABLES

Table S1. Primers used.

| Oligonucleotide        | Sequence                              |
|------------------------|---------------------------------------|
| <b>PCR/qRT-PCR</b>     |                                       |
| mreB-for               | CTGTCGATCGACCTGGG                     |
| mreB-rev               | CAGCCATCGGCTCTTCG                     |
| 16S rDNA_f             | <b>G</b> ACTCCTACGGGAGGCAGCAGT        |
| 16S rDNA_r             | GTATTACCGCGGCTGCTGGCAC                |
| brlR_RT-for            | GCAACGACACCAGCACAC                    |
| brlR_RT-rev            | GAAGCGTTCACAGAGCTG                    |
| pslA-RT-for            | CACAACCGCATCGTCGACG                   |
| pslA-RT-rev            | CTTGGAGTCGAGCCTGATC                   |
| mexA-for               | CAGCAGCTCTACCAGATCGAC                 |
| mexA-rev               | GTATTGGCTACCGTCTCCAG                  |
| mexE-for               | GTCATCGAACAACCGCTG                    |
| mexE-rev               | GTCGAAGTAGGCGTAGACC                   |
| Pser-up                | CGAGTGTTTAAGGCAACGGTCTTGA             |
| Pser-down              | AGTTCGGCCTGGTGGAGCAACTCG              |
| <b>Mutagenesis</b>     |                                       |
| PA4843delF1-Sac        | GCGCGCGGAGCTCGCATAAGCATGCCGTAGTCC     |
| PA4843delR1-Xba        | GCGCGCGCTCTAGAGAGTTCGCTGATCGACTCG     |
| PA4843delF2-Xba        | GCGCGCGCTCTAGAGCGCTGTTCTCAAGCAAC      |
| PA4843delR2-Hind       | GCGCGCGCAAGCTTGCAAGGAGCAGGGTGTGAG     |
| <b>Cloning</b>         |                                       |
| PbrlR-His6V5-pET-for   | CACCCTCCCTTTGCGATGGGTTTCCAC           |
| brlR-pET-rev           | ATAGATGGGGATATACAGGTTCGAC             |
| P120-brlR-CTX-XbaI-for | GCGCGCGCTCTAGACTCCCTTTGCGATGGGTTTCCAC |
| P120-brlR-CTX-XmaI-rev | GCGCGCGCCCCGGTCAATGGTGATGGTGATG       |
| PA4929_pET-for         | CACCATGAGCAATTCCGACG                  |
| PA4929_pET-rev         | GGAGATACGCTCCGGTGCCAG                 |
| rbdA_pET-for           | CACCATGAGGCAGAACCGG                   |

|                  |                                |
|------------------|--------------------------------|
| rbdA_pET-rev     | CCGGAGGTTCTGTCC                |
| His/V5_EcoR1_rev | GCGCGCGAATTCTCAATGGTGATGGTGATG |

**Streptavidin bead assays**

|         |                     |
|---------|---------------------|
| PmexAF* | GTAGTTCATTGGTTTGGCC |
| PmexAR  | CATAGCGTTGTCCTCATG  |
| PmexEF* | GGATCAGCATGTTTCATCG |
| PmexER  | CTGTTCCATGCTTGACTC  |

---

\*, primers were biotinylated; unbiotinylated primers were used for competition.

SUPPLEMENTARY FIGURES

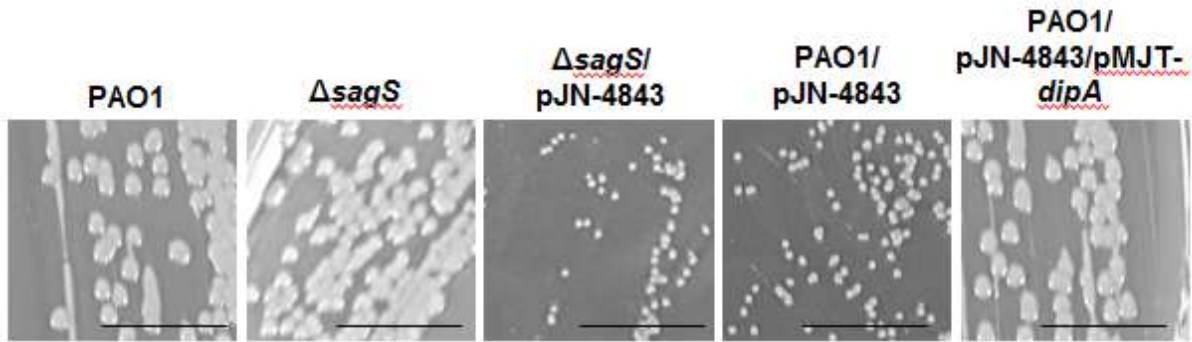

Figure S1. Appearance of colonies formed by *P. aeruginosa* PAO1,  $\Delta$ *sagS*, strains overexpressing PA4843 or strains co-expressing PA4843 and *dipA*. Images were acquired following 24 hr of growth on LB agar. Black size bar = 1 cm.

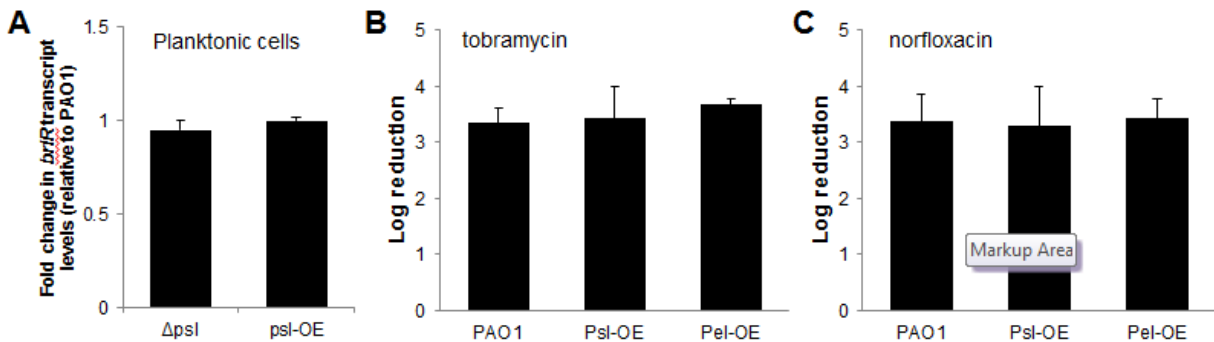

Figure S2. The polysaccharide Psl does not contribute to *brlR* gene expression nor do Psl and Pel contribute to resistance of exponential phase *P. aeruginosa* cells to tobramycin and norfloxacin. (A) Inactivation or overexpression of genes encoding the Psl biosynthetic operon does not affect *brlR* transcript levels in *P. aeruginosa* strains grown planktonically to exponential phase. (B, C) Susceptibility determination of exponential phase planktonic *P. aeruginosa* PAO1 cells and strains overproducing polysaccharides Psl and Pel (*Psl*-OE, *Pel*-OE) to (B) 50  $\mu$ g/ml tobramycin and (C) 150  $\mu$ g/ml norfloxacin. All strains were grown in LB in the presence of 1% arabinose. All planktonic cells were treated for 1 hr and experiments were done in triplicate. Error bars denote standard deviation.
